# Supplementary material for: Next-Generation Sequencing Unravels the Genetic Landscape of Unexplained Neonatal Seizures in a Chinese Cohort
Source: Research Square preprint supplement (doi:10.21203/rs.3.rs-6573736/v1), 2025-05-13
Supplement: Supplementary file 1 [file 546967e797a6773dbedf4ed7.docx]

**Table S1.** Clinical information in neonates with unexplained seizures

| Patient | Time of Onset (days) | Seizure Type | Cranial MRI Findings | Antiepileptic Treatment in Neonatal Period | Treatment Outcome at 3 Months | Treatment Outcome at Final Follow |
| --- | --- | --- | --- | --- | --- | --- |
| 1 | **1** | **Unclear** | **Pachygyria** | **Phenobarbital** | **Seizure-free under Phenobarbital** | **Developmental delay at 6 months** |
| 2 | **1** | **Tonic, Clonic** | **Normal** | **Phenobarbital, Midazolam** | **Seizure-free without treatment** | **Same as above** |
| 3 | **1** | **Clonic** | **White Matter Injury** | **Phenobarbital** | **Seizure-free without treatment** | **Same as above** |
| 4 | **26** | **Tonic** | **Metabolic Encephalopathy** | **Phenobarbital, Midazolam** | **Seizure remission under Levetiracetam** | **Developmental delay at 6 months** |
| 5 | **1** | **Clonic** | **Normal** | **Phenobarbital, Midazolam** | **Seizure-free under Vitamin B6** | **Same as above** |
| 6 | **4** | **Clonic, Automatism** | **Normal** | **Phenobarbital, Midazolam** | **Seizure remission under Levetiracetam** | **Same as above** |
| 7 | **13** | **Epileptic Spasms** | **Subdural Hemorrhage** | **Phenobarbital, Midazolam** | **Seizures persisted without treatment** | **Same as above** |
| 8 | **1** | **Tonic, Unclear** | **NA** | **Phenobarbital, Midazolam** | **Death at 28 days** | **Same as above** |
| 9 | **1** | **Unclear** | **Normal** | **Phenobarbital, Midazolam, Topiramate** | **Seizure remission under Levetiracetam** | **Same as above** |
| 10 | **10** | **Unclear** | **Normal** | **Phenobarbital** | **Seizure remission under Levetiracetam** | **Seizure-free under Oxcarbazepine at 5 years, severe global developmental delay** |
| 11 | **1** | **Tonic, Epileptic Spasms, Clonic** | **Normal** | **Phenobarbital** | **Seizures persisted under Clonazepam** | **Seizure remission under Clonazepam at 4 years, severe global developmental delay** |
| 12 | **1** | **Epileptic Spasms** | **Normal** | **Phenobarbital** | **Seizure remission under Oxcarbazepine** | **Seizure remission under Oxcarbazepine at 6 years, mild developmental delay** |
| 13 | **1** | **Epileptic Spasms** | **Normal** | **Phenobarbital** | **Seizure remission under Levetiracetam** | **Same as above** |
| 14 | **1** | **Epileptic Spasms, Clonic** | **Metabolic Encephalopathy, Multicystic Encephalomalacia** | **Phenobarbital, Midazolam, Topiramate** | **Seizures persisted under Topiramate** | **Seizures persisted under Topiramate at 2 years, severe global developmental delay, death at 2.2 years** |
| 15 | **1** | **Tonic** | **Normal** | **Phenobarbital** | **Seizure-free without treatment** | **Same as above** |
| 16 | **6** | **Epileptic Spasms** | **Normal** | **Phenobarbital, Midazolam** | **Seizure-free under Vitamin B6** | **Same as above** |
| 17 | **5** | **Clonic** | **Normal** | **Phenobarbital, Topiramate** | **Seizure-free under Topiramate** | **Death at 5 months due to pneumonia** |
| 18 | **2** | **Automatism** | **Normal** | **Phenobarbital** | **Infantile spasms, seizure remission under Topiramate** | **Global developmental delay, death at 2 years** |
| 19 | **14** | **Clonic** | **White Matter Signal Abnormality** | **Phenobarbital** | **Seizure-free under Phenobarbital** | **Developmental delay at 6 months** |
| 20 | **5** | **Automatism** | **Normal** | **Phenobarbital** | **Seizures persisted without treatment, unable to suck** | **Same as above** |
| 21 | **28** | **Clonic** | **Corpus Callosum Dysplasia** | **Phenobarbital, Midazolam** | **Seizure remission under Levetiracetam** | **Same as above** |
| 22 | **2** | **Tonic, Epileptic** | **Normal** | **Phenobarbital** | **Seizure-free without treatment** | **Seizure-free at 8 months, normal development** |
| 23 | **3** | **Automatism** | **Normal** | **Phenobarbital** | **Seizures persisted without treatment** | **Seizures persisted, death at 20 months** |
| 24 | **1** | **Tonic, Clonic** | **Normal** | **Phenobarbital** | **Seizure-free under Oxcarbazepine** | **Seizure-free at 3 years, normal development** |
| 25 | **1** | **Clonic** | **White Matter Signal Abnormality** | **Phenobarbital, Midazolam** | **Seizure-free without treatment** | **Seizure-free at 2 years 10 months, normal development** |
| 26 | **1** | **Epileptic Spasms** | **Ventricular Enlargement** | **Phenobarbital, Midazolam** | **Seizure-free without treatment** | **Same as above** |
| 27 | **1** | **Tonic, Epileptic Spasms, Clonic, Automatism** | **Normal** | **Phenobarbital, Midazolam, Levetiracetam, ACTH** | **No seizure remission, death at 48 days** | **Same as above** |
| 28 | **1** | **Tonic, Epileptic Spasms** | **Subependymal Hemorrhage** | **Phenobarbital** | **Seizure remission under Levetiracetam** | **Seizure-free under Levetiracetam at 1 year, developmental delay** |
| 29 | **1** | **Epileptic Spasms** | **Normal** | **Phenobarbital, Midazolam** | **Infantile spasms, no remission under Levetiracetam + ACTH** | **Seizure remission under Levetiracetam + Topiramate at 1 year, global developmental delay** |
| 30 | **22** | **Clonic** | **Suspected Metabolic Encephalopathy** | **Phenobarbital** | **Seizure-free under Phenobarbital** | **Same as above** |
| 31 | **1** | **Unclear** | **Normal** | **Phenobarbital, Midazolam** | **Seizure-free without treatment** | **Normal development at 8 months** |
| 32 | **6** | **Epileptic Spasms** | **Normal** | **Phenobarbital** | **Seizure-free under Oxcarbazepine** | **Seizure-free at 1 year, normal development** |
| 33 | **2** | **Tonic, Epileptic Spasms** | **Normal** | **Phenobarbital, Midazolam, Topiramate** | **Seizure-free under Oxcarbazepine** | **Seizure-free at 1 year 7 months, developmental delay** |
| 34 | **20** | **Epileptic Spasms** | **Normal** | **Phenobarbital, Midazolam** | **Seizure-free under Vitamin B6** | **Same as above** |
| 35 | **3** | **Clonic** | **Normal** | **Phenobarbital** | **Seizure-free without treatment** | **Seizure-free at 1 year 5 months, normal development** |
| 36 | **1** | **Tonic** | **Normal** | **Phenobarbital** | **Seizure-free under Phenobarbital** | **Phenobarbital discontinued at 7 months, seizure-free at 1 year with normal development** |
| 37 | **1** | **Clonic** | **Agenesis of Corpus Callosum, Neuronal Migration Disorder, Interhemispheric Cyst, Posterior Fossa Cyst** | **Phenobarbital, Midazolam** | **Death at 13 days** | **Same as above** |
| 38 | **2** | **Tonic, Epileptic Spasms** | **Metabolic Encephalopathy** | **Phenobarbital, Midazolam** | **No remission under Phenobarbital + Levetiracetam** | **No remission at 8 months, developmental delay** |
| 39 | **20** | **Epileptic Spasms, Automatism** | **Metabolic Encephalopathy** | **Phenobarbital, Midazolam, Levetiracetam** | **No remission, death at 34 days** | **Same as above** |
| 40 | **22** | **Tonic, Epileptic Spasms** | **Normal** | **Phenobarbital, Midazolam, Levetiracetam** | **Seizure remission under Phenobarbital + Levetiracetam + Topiramate** | **Same as above** |
