# Supplementary material for: Next-Generation Sequencing Unravels the Genetic Landscape of Unexplained Neonatal Seizures in a Chinese Cohort
Source: Research Square preprint supplement (doi:10.21203/rs.3.rs-6573736/v1), 2025-05-13
Supplement: Supplementary file 2 [file 63bd30179684b0753738cfe6.docx]

**Table S2** Genetic information in neonates with seizures

| Patient | Testing Program | Gene | Exon | cDNA | Protein | Zygosity | Source | Reported | ACMG rating | Evidence item |
| --- | --- | --- | --- | --- | --- | --- | --- | --- | --- | --- |
| 4 | **CES** | ***SLC19A3*** | **exon3** | **c.842G>A** | **p.Trp281*** | **Het** | **-** | **No** | **LP** | **PVS1+PM2_Supporting** |
| 5 | **CES** | ***ALDH7A1*** | **exon2** | **c.241C>T** | **p.Arg81*** | **Het** | **-** | **Yes** | **P** | **PVS1+PM2_Supporting+PM3** |
| **exon11** | **c.1008+1G>A** | **-** | **Het** | **-** | **Yes** | **P** | **PVS1+PM2_Supporting+PM3** |
| 6 | **CES** | ***MECP2*** | **exon4** | **c.1450_1453del** | **p.Arg484Leufs*27** | **Hemi** | **-** | **No** | **LP** | **PVS1+PM2_Supporting** |
| 10 | **CES** | **20q13.33/17q25.3** | **-** | **-** | **-** | **Het deletion/duplication** | **-** | **Yes** | **P** | **-** |
| 11 | **Trio-WES** | ***GLRA1*** | **exon8** | **c.1030C>T/** | **p.Arg344*** | **Het** | **Paternal** | **Yes** | **P** | **PVS1_Strong+PM2_Supporting+PM3_Supporting** |
| **exon4** | **c.292G>A** | **p.Asp98Asn** | **Het** | **Maternal** | **Yes** | **P** | **PM2_Supporting+PM3_Strong+PP3_Strong** |
| 12 | **CES** | ***PPP2R5D*** | **exon7** | **c.751G>C** | **p.Asp251His** | **Het** | **-** | **Yes** | **LP** | **PM2_Supporting+PP2+PP3+PM5+PM3+PM6** |
| 13 | **CES** | ***KCNQ2*** | **exon3** | **c.394G＞A** | **p.Val132Met** | **Het** | **-** | **Yes** | **LP** | **PM2_Supporting+PP2+PP3+PM6+PS4_Moderate** |
| 14 | **CES** | ***SUOX*** | **exon6** | **c.1200C>G** | **p.Tyr400*** | **Homo** | **-** | **Yes** | **P** | **PVS1_Strong+PM2_Supporting+PM3_VeryStrong** |
| 16 | **WES** | ***ALDH7A1*** | **exon17** | **c.1547A>G** | **p.Tyr516Cys** | **Het** | **Paternal** | **Yes** | **P** | **PM2_Supporting+PP3_Strong+PM3_VeryStrong** |
| **exon11** | **c.965C>T** | **p.Ala322Val** | **Het** | **Maternal** | **Yes** | **P** | **PM2_Supporting+PP3_Strong+PM3_VeryStrong** |
| 17 | **CES** | ***ALPL*** | **exon2** | **c.18del** | **p.Val7Tyrfs*12** | **Homo** | **-** | **Yes** | **P** | **PVS1+PM2_Supporting+PM3** |
| 19 | **CES** | **14q11.2q13.1/**  **18q21.2q23** | **-** | **-** | **-** | **Duplication** | **-** | **Yes** | **P** | **-** |
| 20 | **CES** | ***MECP2*** | **exon3** | **c.317G>A** | **p.Arg106Gln** | **Hemi** | ***de novo*** | **Yes** | **P** | **PM2_Supporting+PP3_Strong+PM6+PS4** |
| 21 | **CES** | ***SLC12A6*** | **exon21** | **c.2809C>T** | **p.Arg937*/** | **Het** | **-** | **No** | **LP** | **PVS1+PM2_Supporting** |
| **exon5** | **c.619C>T** | **p.Arg207Cys** | **Het** | **-** | **Yes** | **P** | **PM2_Supporting+PP3_Strong+PP2+PM5+PM3** |
| 22 | **WES** | ***KCNQ2*** | **exon2** | **c.364T>C** | **p.Ser122Pro** | **Het** | ***de novo*** | **No** | **LP** | **PP2+PM5+PM2_Supporting+PS2** |
| 23 | **WES** | ***SETBP1*** | **exon4** | **c.2605A>G** | **p.Ser869Gly** | **Het** | ***de novo*** | **Yes** | **LP** | **PM6+PM5+PM2_Supporting+PS4_Supporting** |
| 26 | **WES** | ***KCNQ2*** | **exon15** | **c.1742G>A** | **p.Arg581Gln** | **Het** | **-** | **Yes** | **P** | **PS4+PM5+PM2_Supporting+PP3_Strong+PP2+PS2_VeryStrong** |
| 27 | **WES** | ***NSF*** | **exon13** | **c.1375G>T** | **p.Ala459Ser** | **Het** | ***de novo*** | **No** | **LP** | **PM6+PM2_Supporting+PP2+PM5** |
| 28 | **Trio-WES** | ***PPP2R5D*** | **exon5** | **c.592G>A** | **p.Glu198Lys** | **Het** | ***de novo*** | **Yes** | **P** | **PS2_VeryStrong+PS3_Supporting+PS4+PM1+PM2_Supporting+PP2** |
| 29 | **Trio-WES** | ***CASK*** | **exon20** | **c.1837C>T** | **p.Arg613*** | **Hemi** | **Maternal** | **Yes** | **P** | **PVS1+PM2_Supporting+PS4_Supporting** |
| 32 | **Trio-WES** | ***KCNQ2*** | **exon2-3** | **g.62076554_62078244del** | **-** | **Het deletion** | **Maternal** | **No** | **LP** | **PVS1 + PM2_Supporting** |
| 33 | **Trio-WES** | ***KCNQ2*** | **exon4** | **c.688A>G** | **p.Lys230Glu** | **Het** | ***de novo*** | **No** | **LP** | **PS2 + PM2_Supporting + PP3_Moderate** |
| 34 | **WES** | ***ALDH7A1*** | **exon17** | **c.1547A>G** | **p.Tyr516Cys** | **Het** | **Maternal** | **Yes** | **P** | **PM2_Supporting+PP3_Strong+PM3_VeryStrong** |
| **exon11** | **c.965C>T** | **p.Ala322Val** | **Het** | **Paternal** | **Yes** | **P** | **PM2_Supporting+PP3_Strong+PM3_VeryStrong** |
| 36 | **WES** | ***KCNQ2*** | **exon17** | **c.1906_1908del** | **p.Lys636del** | **Het** | **Maternal** | **Yes** | **LP** | **PM4+PM6+PS4_Supporting+PM2_Supporting+PP4** |
| 37 | **Trio-WES** | ***SUOX*** | **exon5** | **c.1406_1421del** | **p.Thr469Serfs*20** | **Het** | **Paternal** | **Yes** | **P** | **PVS1_Strong+PM2_Supporting+PM3_VeryStrong** |
| **exon5** | **c.1200C>G** | **p.Tyr400*** | **Het** | **Maternal** | **Yes** | **P** | **PVS1_Strong+PM2_Supporting+PM3_VeryStrong** |
| ***TUBG1*** | **exon7-10** | **g.40765664_40766675del** | **-** | **Het deletion** | ***de novo*** | **No** | **LP** | **PVS1_Moderate+PS2_Moderate+PM2_Supporting** |
| 38 | **Trio-WES** | ***SUOX*** | **exon5** | **c.1406_1421del** | **p.Thr469Serfs*20** | **Het** | **Paternal** | **Yes** | **P** | **PVS1_Strong+PM2_Supporting+PM3_VeryStrong** |
| **exon5** | **c.1376G>A** | **p.Arg459Gln** | **Het** | **Maternal** | **Yes** | **LP** | **PM2_Supporting + PM3_Strong+ PP3_Moderate** |
| 39 | **Trio-WES** | ***Mt-ND3*** | **-** | **10158T>C** | **Ser(S)-Pro(P)** | **-** | **-** | **Yes** | **Cfrm[P]** | **-** |
| 40 | **Trio-WES** | ***GRIA3*** | **exon12** | **c.1978A>G** | **p.Arg660Gly** | **Hemi** | ***de novo*** | **No** | **LP** | **PS2+PM2_Supporting+PM6** |

**Abbreviations: CES, clinical exome sequencing; WES, whole exome sequencing; Het, heterozygote; Hemi, hemizygote; Homo, homozygous; P, Pathogenic; LP, likely pathogenic; -, Data deficiencies.**
