# Supplementary material for: Next-Generation Sequencing Unravels the Genetic Landscape of Unexplained Neonatal Seizures in a Chinese Cohort
Source: Research Square preprint supplement (doi:10.21203/rs.3.rs-6573736/v1), 2025-05-13
Supplement: Supplementary file 3 [file f19244e089df6573e9dd2491.docx]

***NGS and Analysis***

Exome Sequencing and Functional Variant Prediction

Peripheral blood (2 mL) was collected from the patients and their parents using ethylenediaminetetraacetic acid anticoagulant tubes and sent to the laboratory for clinical exome sequencing (CES) or whole-exome sequencing (WES), as previously described [1, 2]. Genomic DNA was extracted from leukocytes, followed by library preparation, hybridization capture, and paired-end sequencing (150 bp reads) with an average depth of 100× and 99% coverage. Raw sequencing data underwent quality control using FastQC to remove low-quality reads. Clean reads were aligned to the human reference genome (GRCh37/hg19) using BWA-MEM, and variants were called using the Genome Analysis Toolkit (GATK v4.2). Identified variants were annotated using ANNOVAR, following the Human Genome Variation Society nomenclature guidelines. Annotation details included chromosomal coordinates, reference and alternate alleles, gene function, population allele frequencies from the 1000 Genomes Project, Exome Aggregation Consortium, and Genome Aggregation Database (gnomAD). In silico pathogenicity predictions were generated using Rare Exome Variant Ensemble Learner (REVEL), ClinPred, Sorting Intolerant from Tolerant (SIFT), Protein Variation Effect Analyzer (PROVEAN), MutationTaster, Combined Annotation Dependent Depletion, Polymorphism Phenotyping v2 (PolyPhen-2), and the database of splice-altering SNVs (dbscSNV11, version 1.1). The pathogenicity of candidate variants was classified in accordance with the ACMG guidelines [3].

Sanger Sequencing

Candidate variants in the probands and parents were validated through polymerase chain reaction (PCR) with primers designed using Primer3 (https://primer3.org/) and optimized using MFEprimer (https://www.mfeprimer.com/). Purified PCR products were sequenced on an ABI 3730xl analyzer and analyzed using Chromas (https://technelysium.com.au/wp/chromas/).

[1] Huang Z, Xiao F, Xiao H, Lu Y, Yang L, Zhuang D, et al (2023) Comparison of genetic profiles of neonates in intensive care units conceived with or without assisted reproductive technology. JAMA Netw Open 6:e236537.

https://doi.org/10.1001/jamanetworkopen.2023.6537

[2] Yang H, Liu Z, Chen D, Lin W, Wang L, Chen T, et al (2022). Detection of a novel SETBP1 variant in a Chinese neonate with Schinzel-Giedion syndrome. Front Pediatr 10:920741. https://doi.org/10.3389/fped.2022.920741

[3] Brandt T, Sack LM, Arjona D, Tan D, Mei H, Cui H, et al (2020) Adapting ACMG/AMP sequence variant classification guidelines for single-gene copy number variants. Genet Med 22:336–344. https://doi.org/10.1038/s41436-019-0655-2
